# Supplementary material for: COVID-19 Vaccine Hesitancy among Pregnant Women Attending Antenatal Clinics in Pakistan: A Multicentric, Prospective, Survey-Based Study
Source: MDPI journal article supplement (doi:10.3390/v14112344), 2022-10-25
Supplement: s1 [file s1]

**Table S1:** Descriptive statistics for the vaccine hesitancy scales in vaccinated and unvaccinated women

| Item                                   | Number of items | Scale | Possible range | Actual range | Mean | SD   | Median | IQR   | Skewness |
|----------------------------------------|-----------------|-------|----------------|--------------|------|------|--------|-------|----------|
| Hesitancy scale for vaccinated women   | 11              | 1-5   | 11-55          | 17-46        | 29.7 | 5.5  | 28.0   | 26-32 | 1.12     |
| Hesitancy scale for unvaccinated women | 30              | 1-5   | 30-150         | 51-121       | 83.8 | 10.8 | 82.0   | 76-91 | 0.45     |

Note: Higher score in vaccine hesitancy scale for vaccinated women indicates higher hesitancy, whereas higher score in vaccine hesitancy score for unvaccinated women indicates lower hesitancy

**Table S2:** Vaccine hesitancy among unvaccinated pregnant women by participants-related factors

| Items                 | No. of participants | Hesitancy Score Mean (SD) | <i>p</i> -value |
|-----------------------|---------------------|---------------------------|-----------------|
| Age categories        |                     |                           |                 |
| 18-24                 | 43                  | 81.9 (9.6)                | 0.554           |
| 25-29                 | 75                  | 83.7 (12.1)               |                 |
| 30-34                 | 76                  | 85.1 (9.3)                |                 |
| 35-39                 | 32                  | 84.3 (10.6)               |                 |
| Education             |                     |                           |                 |
| No formal education   | 58                  | 81.2 (10.8)               | 0.094           |
| Primary education     | 81                  | 83.2 (9.4)                |                 |
| Secondary education   | 51                  | 84.8 (12.9)               |                 |
| Diploma               | 24                  | 87.6 (9.6)                |                 |
| Graduation and above  | 13                  | 88.0 (10.1)               |                 |
| Occupation            |                     |                           |                 |
| Employed              | 29                  | 90.2 (10.2)               | 0.001           |
| Unemployed            | 18                  | 88.1 (13.6)               |                 |
| Self-employed         | 39                  | 84.8 (8.9)                |                 |
| Housemaker            | 141                 | 81.8 (10.4)               |                 |
| Long-standing illness |                     |                           |                 |
| No                    | 189                 | 83.5 (10.9)               | 0.752           |
| Yes                   | 26                  | 84.2 (8.8)                |                 |
| Gestational week      |                     |                           |                 |
| First Trimester       | 5                   | 90.0 (3.5)                | 0.083           |
| Second Trimester      | 41                  | 80.8 (12.7)               |                 |
| Third Trimester       | 181                 | 84.4 (10.2)               |                 |

|                                       |     |             |       |
|---------------------------------------|-----|-------------|-------|
| Any pregnancy-related issue           |     |             |       |
| No                                    | 190 | 83.7 (10.9) | 0.417 |
| Yes                                   | 29  | 85.5 (10.4) |       |
| Received COVID-19 related information |     |             |       |
| No                                    | 30  | 85.3 (13.1) | 0.422 |
| Yes                                   | 196 | 83.5 (10.3) |       |

Items measuring vaccine hesitancy in vaccinated and unvaccinated women. All items were measured on a 5-point Likert scale

| <b>I have taken the vaccine because (for vaccinated women)</b>                                                                | <b>I have not taken the vaccine because (for unvaccinated women)</b>                                 |
|-------------------------------------------------------------------------------------------------------------------------------|------------------------------------------------------------------------------------------------------|
| the vaccine is an effective way of protecting pregnant women from COVID-19 infection                                          | vaccine does not lower the risk of COVID infection during pregnancy (Q2c)                            |
| the vaccine is important for my health during pregnancy                                                                       | using natural or other remedies are more effective than COVID vaccines (Q2e)                         |
| the vaccine is important for the health of my baby (foetus)                                                                   | COVID vaccines are not Halal and are prohibited by my religious beliefs                              |
| vaccine lowers the risk of COVID-19 infection during pregnancy                                                                | COVID vaccines will adversely affect my ability to become pregnant or have babies in future          |
| vaccines prevent COVID-19 infection from becoming worse and the need for hospitalization                                      | I am concerned that the vaccine will have more harmful effects on my baby than COVID-19 itself       |
| vaccine is a more effective preventive measure than using natural or other remedies                                           | my religious scholars have advised me not to take the COVID-19 vaccine (Q2z)                         |
| COVID-19 vaccines are as safe as other vaccines that are normally used during pregnancy (e.g., flu)                           | herbal or natural treatment is better than COVID vaccine (Q2cc)                                      |
| the benefits of the COVID-19 vaccine during pregnancy outweigh its risks                                                      | the vaccine is not an effective way of protecting pregnant women from COVID-19 infection (Q2a)       |
| there are not many adverse effects reported for COVID-19 vaccines                                                             | the vaccine is not important for the health of my baby (foetus) (Q2c)                                |
| sufficient information is available about the long-term safety and efficacy of COVID-19                                       | vaccine does not prevent COVID infection from becoming worse, and the need for hospitalization (Q2d) |
| I trust information shared by government or public health agencies about the efficacy and safety profile of COVID-19 vaccines | using natural or other remedies are safer than COVID vaccines                                        |
|                                                                                                                               | the benefits of the COVID vaccine during pregnancy do not outweigh the risks                         |
|                                                                                                                               | insufficient information is available about the long-term safety and efficacy of COVID vaccines      |
|                                                                                                                               | COVID is a conspiracy, and I am not worried about catching COVID infection during my pregnancy       |

|  |                                                                                                                                   |
|--|-----------------------------------------------------------------------------------------------------------------------------------|
|  | my doctor has not encouraged me to take the COVID-19 vaccine during pregnancy (Q2y)                                               |
|  | the vaccine is not important for my health during pregnancy (Q2b)                                                                 |
|  | there are too many adverse effects reported for COVID vaccines                                                                    |
|  | I do not trust information shared by government or public health agencies about the efficacy and safety profile of COVID vaccines |
|  | my husband or other family members will not allow me to take the COVID vaccine                                                    |
|  | spiritual treatment is better than taking vaccines (Q2dd)                                                                         |
|  | COVID vaccines are not as safe as other vaccines that are normally used during pregnancy (e.g., flu)                              |
|  | COVID vaccines available in my country are not as effective as those in Western countries                                         |
|  | COVID vaccines available in my country are not as safe as those in Western countries                                              |
|  | COVID vaccines available in my country are not fit for travel abroad                                                              |
|  | COVID vaccines contain animal ingredients, and I don't take medications containing animal ingredients                             |
|  | COVID is real, but I think it won't do any harm to me during pregnancy                                                            |
|  | COVID is real, but I think it won't do any harm to my baby during pregnancy                                                       |
|  | I will die in two years if I take the COVID-19 vaccines                                                                           |
|  | I have not taken the vaccine because the vaccine brand that I wanted was not available in my region (Q2aa)                        |
|  | I usually do not trust or believe in vaccines and do not take vaccines in general (Q2bb)                                          |
